# Supplementary material
Source: publisher figshare collection journal article supplement (https://gsajournals.figshare.com/ndownloader/files/24973199)
Supplement: Supplementary file 1 [file 24973199]

## Sheet: Genetic correlation
	F.Weight	Hue.g	Ethylene	RI	TA	Glucose	Fructose	Sucrose	CitricA.	MalicA.
F.Weight	1	0.25	0.31	-0.59	0.60	0.08	0.18	-0.52	0.49	-0.32
Hue.g	0.25	1	0.05	-0.58	-0.48	0.25	-0.24	-0.46	-0.44	-0.13
Ethylene	0.31	0.05	1	-0.86	0.62	-0.58	-0.88	-0.97	0.89	-0.98
RI	-0.59	-0.58	-0.86	1	-0.48	0.51	0.62	1	-0.54	0.67
TA	0.60	-0.48	0.62	-0.48	1	-0.72	-0.15	-0.55	0.95	-0.35
Glucose	0.08	0.25	-0.58	0.51	-0.72	1	0.38	0.61	-0.59	0.12
Fructose	0.18	-0.24	-0.88	0.62	-0.15	0.38	1	0.71	-0.53	0.89
Sucrose	-0.52	-0.46	-0.97	1	-0.55	0.61	0.71	1	-0.64	0.73
CitricA.	0.49	-0.44	0.89	-0.54	0.95	-0.59	-0.53	-0.64	1	-0.76
MalicA.	-0.32	-0.13	-0.98	0.67	-0.35	0.12	0.89	0.73	-0.76	1
